# Does the A118G Polymorphism at the $\mu$ -opioid Receptor Gene Protect against Morphine-6-Glucuronide Toxicity?

Jörn Lötsch, M.D.,\* Michael Zimmermann, M.D.,† Jutta Darimont,‡ Claudia Marx, M.D.,§ Rafael Dudziak, M.D.,|| Carsten Skarke, M.D.,# Gerd Geisslinger, M.D., Ph.D.\*\*

**Background:** Some, but not all, patients with renal dysfunction suffer from side effects after morphine administration because of accumulation of the active metabolite morphine-6-glucuronide (M6G). The current study aims to identify genetic causes that put patients at risk for, or protect them from, opioid side effects related to high plasma M6G. Candidate genetic causes are the single nucleotide polymorphism (SNP) A118G of the  $\mu$ -opioid-receptor gene (OPRM1), which has recently been identified to result in decreased potency of M6G, and mutations in the MDR1-gene coding P-glycoprotein, of which morphine and M6G might be a substrate.

**Methods:** Two men, aged 87 and 65 yr, with renal failure (creatinine clearance of 6 and 9 ml/min) received 30 mg/day oral morphine for pain treatment. Both patients had sufficient analgesia from morphine. However, while one patient tolerated morphine well despite high plasma M6G of 1735 nM, in the patient with M6G plasma concentrations of 941 nM it caused severe sleepiness and drowsiness. Patients were genotyped for known SNPs of the OPRM1 and MDR1 genes.

**Results:** The patient who tolerated morphine well despite high plasma M6G was a homozygous carrier of the mutated G118 allele of the  $\mu$ -opioid-receptor gene, which has been previously related to decreased M6G potency. In contrast, the patient who suffered from side effects was "wild-type" for this mutation. No other differences were found between the OPRM1 and MDR1 genes.

**Conclusions:** The authors hypothesize that the A118G single nucleotide polymorphism of the  $\mu$ -opioid-receptor is among the protective factors against M6G-related opioid toxicity. The observation encourages the search for pharmacogenetic reasons that cause interindividual variability of the clinical effects of morphine.

MORPHINE-6-GLUCURONIDE (M6G) is an active metabolite of morphine. Because it is eliminated *via* the kidney, it accumulates in patients with renal failure. In those patients, M6G rises to more than 4,000 nM (table 1), whereas in healthy volunteers peak M6G concentrations of about 400 nM are reached after oral dosing of 90 mg morphine sulfate.<sup>1</sup> M6G accumulation is a risk factor for opioid toxicity during morphine treatment (table 1). However, this is not seen in every patient with

renal insufficiency who receives morphine. The identification of factors that put a specific patient at risk for, or protect a patient from, opioid side effects under high plasma M6G would greatly enhance the individualization, and thus safety, of morphine therapy.

## Materials and Methods

### Clinical Cases

Patient B was an 87-yr-old man (body weight 66.5 kg, body height 180 cm) suffering from plasmacytoma, osteoporosis, a fracture of the twelfth vertebral body, arterial hypertension, and advanced renal failure (serum creatinine 8.5 mg/dl, calculated creatinine clearance 6 ml/min, blood urea nitrogen 238 mg/dl). The patient was admitted to the hospital for conservative orthopedic treatment. He suffered from severe lower back pain. His mental state was clear and oriented to place, time, and his person. There were no clinical signs for cerebral metastases or increased intracerebral pressure. His pupils were equal in size and reacted to light. Respiratory rate and function was within normal range (10-16/min). The patient had had no treatment with psychopharmacologic drugs or chemotherapy causing sedation. When the pain service was called the pain intensity was 7 on the visual analog scale (VAS; range 0-10). Pain was insufficiently treated with dipyrone (4  $\times$  750 mg/day, a nonopioid analgesic without significant antiphlogistic properties) and tramadol (4  $\times$  75 mg/day) and subsequently changed to 30 mg/day of oral morphine slow release. One day after morphine administration had been initiated the patient was pain-free (VAS 0-1) but showed sedation level 3 (Sedation score; 0 = no sedation - 6 = not arousable)<sup>2</sup> and drowsiness. He was sleepy but always arousable and answered adequately to questions but initiated no activity on his own. The patient stayed in bed most of the day and had no appetite. Questions concerning orientation to place, time, or to his person were answered slowly. For walking, eating, and drinking he needed assistance. These symptoms developed during the first day of morphine treatment.<sup>3</sup> His relatives were upset by the change in his mental state, but on the other hand, were glad to see him with no or minimal pain. The patient's respiratory rate and function was sufficient, no bradypnea less than 8/min or cyanotic changes were seen. Pupil size was equal in both eyes and pupils were smaller in size than with the treatment before. Reaction to light was slower in both pupils than with tramadol. No other drugs were changed or added. Hemodialysis was not considered necessary. Because of

\* Clinical Pharmacologist, # Physician, \*\* Professor of Clinical Pharmacology and Chairman, *pharmazentrum frankfurt*, Department of Clinical Pharmacology, || Professor of Anesthesia and Chairman, † Anesthesist, Department of Anesthesia, Intensive Care and Pain Therapy, ‡ Medical Student, Johann Wolfgang Goethe-University, Frankfurt. § Physician, Dr. Margarete Fischer-Bosch Institute of Clinical Pharmacology, Stuttgart, Germany.

Received from the *pharmazentrum frankfurt*, Department of Clinical Pharmacology, Johann Wolfgang Goethe-University, Theodor Stern Kai 7, D-60590 Frankfurt, Germany. Submitted for publication December 5, 2001. Accepted for publication May 17, 2002. Supported by grant No. DFG Lo 612/3-1 from the Deutsche Forschungsgemeinschaft, Bonn, Germany.

Address reprint requests to Dr. Lötsch: *pharmazentrum frankfurt*, Department of Clinical Pharmacology, Johann Wolfgang Goethe-University, Theodor Stern Kai 7, D-60590 Frankfurt, Germany. Address electronic mail to: j.loetsch@em.uni-frankfurt.de. Individual article reprints maybe purchased through the Journal Web site, [www.anesthesiology.org](http://www.anesthesiology.org).

**Table 1. Plasma Morphine, M6G and M3G Concentrations, and M3G to M6G Ratios from Reports of Patients with Renal Failure in Whom M6G Had Been Related to Side Effects during Morphine Therapy and the Concentrations Found in the Present Patients**

| Reference | Study Population                                             | Morphine Dose                                                                         | Plasma Concentration (nm)         |                                                |                                   | M3G:M6G                    | Unwanted Clinical Effects                                                         |
|-----------|--------------------------------------------------------------|---------------------------------------------------------------------------------------|-----------------------------------|------------------------------------------------|-----------------------------------|----------------------------|-----------------------------------------------------------------------------------|
|           |                                                              |                                                                                       | Morphine                          | M6G                                            | M3G                               |                            |                                                                                   |
| 24        | 3 patients                                                   | 1: ≈84 mg in 42 h<br>2: ≈361 in 5 days<br>3: ≈415 in 3 days                           | 1: < 10<br>2: < 10<br>3: up to 39 | 1: up to 386<br>2: up to 848<br>3: up to 2,342 | 1: 2,040<br>2: 3,670<br>3: 10,220 | 1: 5.3<br>2: 4.3<br>3: 4.4 | Respiratory depression                                                            |
| 25        | 7 patients with high plasma M6G from a total of 109 patients | 90 mg orally or 70–3139 mg intravenously, in 48 h                                     | 213–2,390                         | 4,475–38,638                                   | Not given                         | —                          | Respiratory depression, moderate to severe cognitive impairment<br>Chronic nausea |
| 26        | 1 patient                                                    | 30 mg twice daily long-term oral morphine                                             | ≈700                              | ≈863                                           | Not given                         | —                          |                                                                                   |
| 20        | 7 patients                                                   | 195 mg/d orally or 160 mg/d intravenously                                             | 220                               | 1,500                                          | 12,000                            | 8.4                        | Nausea, vomiting, confusion                                                       |
| 21        | 1 patient                                                    | 30 + 40 mg perioperatively, 36 mg in 18 h postoperatively, 4 mg in the following 13 h | < 81.6                            | 1,483                                          | 11,224                            | 7.6                        | Coma, no respiratory depression                                                   |
| 27        | 1 patient (7 yr old, 27 kg)                                  | 115 mg on the first postoperative day                                                 | 27.4                              | 2,655                                          | 13,790                            | 5.2                        | Respiratory depression                                                            |
| 28        | 1 patient                                                    | 141 mg/d for 11 d                                                                     | < 10                              | 4,400                                          | 9,200                             | 2.1                        | Respiratory depression                                                            |
| 29        | 12 patients                                                  | 2–5 mg/h to 3–15 mg/h for 56–528 h                                                    | 249                               | Not given                                      | Not given                         | —                          | Depression of consciousness                                                       |
| Current   | 2 patients (“B” and “S”)                                     | 30 mg/d orally                                                                        | B: 35<br>S: 41.1                  | B: 941<br>S: 1,735                             | B: 3,634<br>S: 8,251              | B: 3.9<br>S: 4.8           | B: Sedation<br>S: None                                                            |

the severe impairment of the patient's vigilance, morphine was discontinued (total given dose 60 mg) and replaced by 300 mg/day of a slow release tramadol formulation. Forty-eight hours later, the patient's sleepiness had disappeared and normal communication with him was possible. He became more active. In eating, drinking, and walking he was self-dependent again. Tramadol now provided sufficient pain relief. Plasma concentrations of morphine and M6G of 10 and 436 ng/ml, respectively, were measured during the time when the patient had a reduced vigilance.

The second patient, Patient S, was a 65-yr-old man (body weight 61.9 kg, height 168 cm) with advanced renal disease (serum creatinine of 8 mg/dl, calculated creatinine clearance 9 ml/min, blood urea nitrogen 137 mg/dl) caused by glomerulonephritis, failed kidney transplant, peripheral vascular disease with necrotic ulcerations at the right foot, and atrial fibrillation with pacemaker. The patient had increasing pain in his right foot for several days and weeks. Pain-intensity was scored with 9 on the visual analog scale (VAS 0–10). Sleep at night was disturbed because of the pain. His mental state was oriented in place, time, and to his person. Answers to questions came slowly. Respiratory function was normal and pupils reacted equally to light. Oral tilidine/naloxone (300 mg/day, a combination of a weak opioid with an antagonist to eliminate its intravenous abuse potential; tilidine is a prodrug that to become analgesic has to be metabolized to the active nortilidine,

which happens mainly during the first-pass effect) and dipyrone (2 g/day) did not sufficiently reduce the patient's pain and were therefore replaced with 30 mg/day morphine plus dipyrone 4 g/day. A tricyclic antidepressant in a low dose of 5 mg doxepin at night was prescribed for sleeping. This regimen adequately relieved the patient's pain and was well tolerated. The pain intensity reduced to VAS 0–1 and sleep at night was possible again. Respiration was normal and pupil size smaller than before. Reaction to light was equal in both eyes. Most importantly, no alterations of the patient's vigilance state were seen. The patient was oriented to place, time, and his person at any time. With the reduced pain he was quicker in his reactions and answers than before. Plasma concentrations of morphine and M6G of 12.3 and 804 ng/ml, respectively, were measured on the eighth day after morphine therapy was begun.

Although direct comparison of the plasma samples of the two patients may be flawed by their different timing relative to morphine dosing, the concentrations clearly indicate M6G accumulation whereas morphine concentrations were low. Patient B corresponded to the cases of M6G toxicity listed in table 1<sup>20,21,24–29</sup>. Neither disease state nor concomitant medications (table 2) provided a satisfactory explanation of why patient S showed no such side effects. We therefore screened the patients for genetic polymorphisms in the OPRM1-gene (coding the μ-opioid receptor). The motive to examine polymorphisms of the OPRM1-gene (table 3<sup>8,9,23,30–34</sup>) derives

**Table 2. Demographic and Clinical Data for the Two Patients with Impaired Renal Function Who Differed in How They Tolerated Morphine Therapy**

|                                             | Patient B                                                                                                                                                                            | Patient S                                                                                                                                |
|---------------------------------------------|--------------------------------------------------------------------------------------------------------------------------------------------------------------------------------------|------------------------------------------------------------------------------------------------------------------------------------------|
| Demography                                  | Male, 87 yr, 180 cm, 66.5 kg                                                                                                                                                         | Male, 65 yr, 168 cm, 61.9 kg                                                                                                             |
| Diagnoses                                   | End-stage renal insufficiency, plasmocytoma, osteoporosis, fracture of the 12th vertebral body, arterial hypertension                                                                | End-stage renal insufficiency, peripheral vascular disease with necrotic ulcerations at the right foot, atrial fibrillation              |
| Serum creatinine                            | 8.5 mg/dl                                                                                                                                                                            | 8 mg/dl                                                                                                                                  |
| Calculated creatinine clearance             | 6 ml/min                                                                                                                                                                             | 9 ml/min                                                                                                                                 |
| BUN                                         | 238 mg/dl                                                                                                                                                                            | 137 mg/dl                                                                                                                                |
| Morphine                                    | 30 mg/d sustained release oral formulation                                                                                                                                           | 30 mg/d sustained release oral formulation                                                                                               |
| Concomitant analgesics                      | —                                                                                                                                                                                    | 4 g/d dipyrone                                                                                                                           |
| Other concomitant medications (daily doses) | Furosemide (40 mg), amlodipine (5 mg), metoprolol (95 mg), omeprazole (20 mg), calcitriol (0.25 mg), lactulose (10 ml), levofloxacin (250 mg), low molecular weight heparin (0.3 ml) | Calcium carbonate (1.5 g), magnesium, vitamins, iron, folic acid, cyanocobalamine, erythropoietin, low molecular weight heparin (0.3 ml) |
| Morphine analgesia                          | Yes                                                                                                                                                                                  | Yes                                                                                                                                      |
| Morphine side effects                       | Yes: dizziness, sleepiness, apathy                                                                                                                                                   | None                                                                                                                                     |

BUN = blood urea nitrogen.

mainly from our recent observation that the potency of M6G is decreased in carriers of the mutated G118 allele of the OPRM1-gene.<sup>4</sup> Specifically, the potency of M6G to produce pupil constriction in a homozygous carrier of the G118 mutated allele was significantly reduced by about four times compared with homozygous carriers of the wild-type allele A118. This makes this single nucleotide polymorphism (SNP) a candidate for explaining why the patient without side effects had sufficient analgesia from morphine while not suffering from central nervous opioid side effects caused by M6G accumulation.

In addition, we screened the patients for genetic polymorphisms in the genes that code for transporters that may play an important role for the CNS concentrations of morphine or M6G. Candidates of such transporters are P-glycoprotein (P-gp) or probenecid sensitive transporters, e.g., multidrug-resistance related proteins (MRP), organic anion transporters (OAT), or organic anion transporter polypeptides (OATP), which are all expressed at the blood brain barrier, and which have glucuronides among their substrates. The rationale for examining genetic polymorphisms of the MDR1 gene (table 3) is based on the evidence for P-gp expression at the blood-brain barrier<sup>5</sup> and on the report that the brain concentrations of M6G<sup>6</sup> and of morphine<sup>7</sup> are significantly increased when P-gp is blocked. In addition, it is known that genetic causes may modify the P-gp functionality. The C3435T SNP in the MDR1-gene is frequent among Caucasians (frequency of the mutated T3435 allele of about 50%.<sup>8,9</sup>) It was shown to result in decreased intestinal P-gp expression with enhanced bioavailability of digoxin.<sup>8</sup> Screening for known polymorphisms of the MRP2 gene was motivated by the knowledge that glucuronides are possible substrates of it,<sup>10</sup> and that coadministration of probenecid, that inhibits MRP2, resulted in enhanced morphine antinociception in rats.<sup>11</sup> For the

other candidate, probenecid sensitive transporters that might transport M6G such as OATs and OATPs, there are currently no SNPs known with consequences for the transporter function in general, or for the distribution of a specific pharmaceutical substance. Summaries of the human ABC transporters to which belong MDR1 and MRP can be found in Klein *et al.*,<sup>12</sup> of OATP in Tamai *et al.*,<sup>13</sup> and of OAT in Sweet *et al.* and Sekine *et al.*<sup>14,15</sup> The investigation's protocol had been approved by the Johann Wolfgang Goethe-University of Frankfurt Medical Faculty Ethics Review Board and the patients gave informed consent to enrollment and procedures. The guidelines of the Declaration of Helsinki on biomedical research involving human subjects (Somerset West amendment) were obeyed.

#### *Screening for Single Nucleotide Polymorphisms of the Genes Coding $\mu$ -Opioid Receptors or ABC Transporters*

Genomic DNA was prepared from a blood sample using standard techniques. SNPs were detected by sequence analysis, using products of the polymerase chain reaction (PCR) from LightCycler (Roche, Mannheim, Germany) reactions that had been performed as a screening test before sequencing. After purification with the QIAquick PCR purification kit (QIAGEN, Hilden, Germany) each sample was resuspended in 20  $\mu$ l distilled water. Approximately 50 ng PCR product was analyzed using an ABI Prism BigDye Terminator Cycle Sequencing Kit (Perkin-Elmer/Applied Biosystems, Weiterstadt, Germany). For primers (TIB MOLBIOL, Berlin, Germany) used for sequencing see table 3. The PCR sequencing reaction was performed in a total volume of 10  $\mu$ l containing 2  $\mu$ l premix (AmpliTaq DNA polymerase, BigDye terminators (A-dR6G; C-dROX; G-dR110; T-dTAMRA), desoxynucleoside triphosphates, Mg<sup>2+</sup>, Tris-HCl pH

**Table 3. Known Single Nucleotide Polymorphisms of the Human *OPRM1* (Chromosome 6q24–q25), *MDR1*, and *MRP2* Genes (Chromosomes 7q21 and 10q24, Respectively) that Result in an Amino Acid Exchange or Have Been Shown to Have Functional Consequences and Genotypes of the Two Patients at the Respective Gene Positions; Primers Used for Sequencing Are Also Given**

| Gene         | Exon | Nucleotide Position | Amino Acid Exchange | Frequency of Mutated Allele (%) | Frequency of Heterozygous Subjects (%) | Reference | Patient B | Patient S | Primers                                                      |
|--------------|------|---------------------|---------------------|---------------------------------|----------------------------------------|-----------|-----------|-----------|--------------------------------------------------------------|
| <i>OPRM1</i> | 1    | C12G                | Ser4Arg             | ?                               | ?                                      | 30        | C/C       | C/C       |                                                              |
|              | 1    | C17T                | Ala6Val             | 1.9                             | 3.8                                    | 23        | C/C       | C/C       | Forward: 5'-GCT TGG AAC CCG AAA AGT CT-3'                    |
|              |      |                     |                     | 10                              |                                        | 31        |           |           |                                                              |
|              | 1    | G24A                | Silent              | 2                               | ?                                      | 23        | G/G       | G/G       | Reverse: 5'-ACT TGA GTA CGC CAA GGC ATC-3'                   |
|              | 1    | A118G               | Asn40Asp            | 11.5                            | 19.2                                   | 23        | A/A       | G/G       | Forward: 5'-GTC AGT ACC ATG GAC AGC AG-3'                    |
|              |      |                     |                     |                                 |                                        |           |           |           | Reverse: 5'-GTA GAG GGC CAT GAT CGT GAT-3'                   |
|              | 2    | C440G               | Ser147Cys           | 0.3                             | 0.6                                    | 32        | C/C       | C/C       | Forward: 5'-CCA TTT GGA ACC ATC CTT TG-3'                    |
|              | 2    | A454G               | Asn152Asp           | ?                               | ?                                      | 33        | A/A       | A/A       | Reverse: 5'-GAC CAA TGG CTG AAG AGA GG-3'                    |
|              | 3    | G779A               | Arg260His           | < 1                             | 0.7                                    | 23        | G/G       | G/G       | Forward: 5'-CTG GGA AAA CCT GCT GAA GA-3'                    |
|              | 3    | G794A               | Arg265His           | ?                               | ?                                      | 33        | G/G       | G/G       | Reverse: 5'-CCA GCA GAC GAT GAA CAC AG-3'                    |
| <i>MDR1</i>  | 3    | T802C               | Ser268Pro           | ?                               | ?                                      | 33        | T/T       | T/T       |                                                              |
|              | 2    | A61G                | Asn21Asp            | 11.2                            | 20.6                                   | 9         | A/G       | A/G       | Forward: 5'-AGG AGC AAA GAA GAA GAA CTT TTT TAA ACT GAT C-3' |
|              |      |                     |                     | 9.3                             | 17.6                                   | 8         |           |           | Reverse: 5'-GAT TCC AAA GGC TAG CTT GC-3'                    |
|              | 5    | T307C               | Phe103Leu           | 0.6                             | 1.2                                    | 9         | T/T       | T/T       | Forward: 5'-GTG GTT GCA CAC AGT CAG CA-3'                    |
|              |      |                     |                     |                                 |                                        |           |           |           | Reverse: 5'-GGA GGA TGT CTA ATT ACC TGG TCA-3'               |
|              | 11   | G1199A              | Ser400Asn           | 5.5                             | 11.1                                   | 9         | G/G       | G/G       | Forward: 5'-CAG CTA TTC GAA GAG TGG GC-3'                    |
|              |      |                     |                     | 6.5                             | 12.9                                   | 8         |           |           | Reverse: 5'-CCG TGA GAA AAA AAC TTC AAG G-3'                 |
|              | 21   | G2677T              | Ala893Ser           | 41.6                            | 49.2                                   | 9         | T/T       | T/T       | Forward: 5'-TGC AGG CTA TAG GTT CCA GG-3'                    |
|              |      |                     |                     | 63.9                            | 43.4                                   | 8         |           |           | Reverse: 5'-GTT TGA CTC ACC TTC CCA G-3'                     |
|              | 21   | G2677A              | Ala893Thr           | 0.9                             | 2                                      | 9         | NA        | NA        | Forward: 5'-TGC AGG CTA TAG GTT CCA GG-3'                    |
| <i>MRP2</i>  |      |                     |                     |                                 |                                        |           |           |           | Reverse: 5'-TTT AGT TTG ACT CAC CTT CCC G-3'                 |
|              | 26   | A3320C              | Gln1107Pro          | 0.2                             | 0.4                                    | 9         | A/A       | A/A       |                                                              |
|              | 26   | C3396T              | Ala1132Ala          | 0.3                             | 0.5                                    | 8         | C/C       | C/C       | Forward: 5'-ATC TGT GAA CTC TTG TTT TCA GC-3'                |
|              | 26   | C3435T              | Ile1145Ile          | 50.3                            | 47.7                                   | 8         | T/T       | T/T       | Reverse: 5'-TCG ATG AAG GCA TGT ATG TTG-3'                   |
|              |      |                     |                     | 53.9                            | 50.5                                   | 9         | —         | —         |                                                              |
|              | 10   | G1249A              | Val417Ile           | 12.5                            | 20.8                                   | 34        | G/G       | G/G       | Forward: 5'-GGG TCC TAA TTT CAA TCC TTA-3'                   |
|              |      |                     |                     |                                 |                                        |           |           |           | Reverse: 5'-TAT TCT TCT GGG TGA CTT TTT-3'                   |
|              | 18   | C2302T              | Arg768Trp           | 1                               | 2.1                                    | 34        | C/C       | C/C       | Forward: 5'-GGA GTA GTG CTT AAT ATG AAT-3'                   |
|              | 18   | C2366T              | Ser789Phe           | 1                               | 2.1                                    | 34        | C/C       | C/C       | Reverse: 5'-CCC ACC CCA CCT TTA TAT CTT-3'                   |
|              | 28   | C3972T              | Ile132Ile           | 21.9                            | 35.4                                   | 34        | C/T       | C/T       | Forward: 5'-TGC TAC CCT TCT CCT GTT CTA-3'                   |
| <i>MRP2</i>  |      |                     |                     |                                 |                                        |           |           |           | Reverse: 5'-ATC CAG GCC TTC CTT CAC TCC-3'                   |
|              | 31   | G4348A              | Ala1450Thr          | 1                               | 2.1                                    | 34        | G/G       | G/G       | Forward: 5'-AGG AGC TAA CAC ATG GTT GCT-3'                   |
|              |      |                     |                     |                                 |                                        |           |           |           | Reverse: 5'-GGG TTA AGC CAT CCG TGT CAA-3'                   |

† Sequence is not translated.

9,0), 1 μl PCR primer (10 μM), 3 μl purified PCR product from the LightCycler, and additional distilled water. After initial denaturation at 95°C for 3 min PCR was carried out with 25 cycles of denaturation (95°C, 10 s), annealing (55°C, 5 s), and extension (60°C, 90 s). To purify the sequenced PCR product the method of ethanol precipitation was applied. After drying the pellet for 5 min at 45°C in a vacuum centrifuge, it was resuspended in 25 μl Template Suppression Reagent (TSR, PE/Applied Biosystems, Weiterstadt, Germany). Analysis was carried out at an ABI PRISM 310 Genetic Analyzer (PE/Applied Biosystems, Weiterstadt, Germany).

## Results

Patient S, who tolerated morphine treatment despite high plasma M6G, was homozygous for the mutated G118 allele of the *OPRM1* gene, whereas patient B,

whose vigilance was severely impaired, was a homozygous carrier of the wild-type allele A118 (Fig. 1). In the other SNPs searched for in the *OPRM1*, *MDR1*, and *MRP2* genes, the patients did not differ (table 3).

## Discussion

Considering our recent report of a decreased potency of M6G in carriers of the mutated G118 allele of the *OPRM1* gene,<sup>4</sup> we would like to hypothesize that the A118G SNP could be a reason why one patient tolerated very high M6G plasma concentrations whereas the other patient showed typical opioid CNS side effects. The specific relation of the vigilance effects to morphine/M6G is emphasized by their disappearance after morphine had been replaced by tramadol. The latter also makes a pharmacodynamic interaction between coadministered quinolones or β-blockers as the cause for the



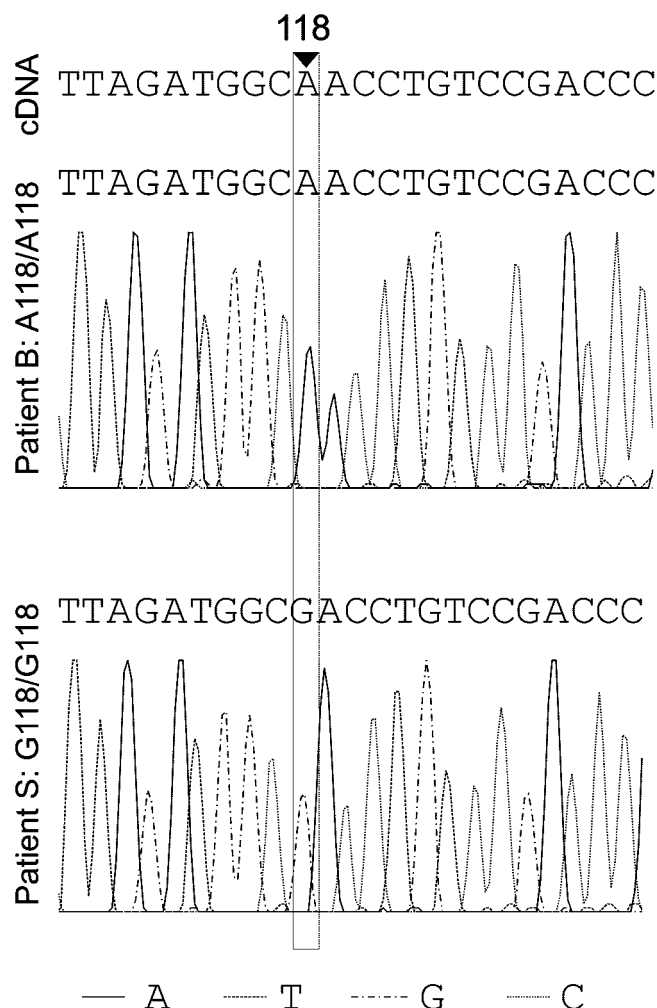

Fig. 1. Results of the sequence analysis of  $\mu$ -opioid-receptor gene. Only the fragment of the sequence spanning the gene sector of the single nucleotide polymorphism at position 118 is shown (position 118 marked with a rectangle). The sequence was compared with the OPRM1 cDNA (gene data base access number L25119; first line in the figure, "cDNA").

CNS side effects unlikely. Such an assumption would require an explanation of why the interaction happened with morphine only, but not with tramadol, which is partly a  $\mu$ -opioid agonist. Another drug interaction with morphine, M6G, or both may be caused by omeprazol, which has recently been reported to block P-gp.<sup>16</sup> By this mechanism, and assuming that M6G is a substrate of P-gp, the M6G concentrations in the CNS could have been increased in patient B. However, it is reported that omeprazol is likely to reach plasma concentrations high enough to block P-gp only in cytochrome P450 (CYP) 2C19 poor-metabolizers, who eliminate omeprazol slowly. Patient B, however, showed an extensive metabolizer phenotype predicted on the basis of genotyping for the most relevant defective alleles *CYP2C19* \*2 and \*3.<sup>17,18</sup> By this, together with the identical genotype of the patients with respect to *MDR1*, P-gp blockade mediated M6G<sup>6</sup> or morphine<sup>7</sup> accumulation in the CNS

are not more likely to have occurred in patient B than in patient S.

Because morphine-3-glucuronide (M3G) has been hypothesized to be a functional antagonist of morphine and M6G,<sup>19</sup> the side effects of M6G in patient S could have been antagonized by his higher plasma M3G compared to patient B. However, the elimination of M6G and M3G is equally affected in patients with renal failure, as indicated by an almost straight-line correlation between M3G and M6G plasma concentrations over a wide range of serum creatinine values.<sup>20</sup> The assumption of such protection raises the questions why patients ever develop M6G toxicity and are not always protected from it by M3G. The M3G:M6G concentration ratios of 3.9 and 4.8 for patient B and patient S, respectively, are both within the range of those calculated from the reported concentrations values of M3G and M6G from patients with renal failure and M6G-caused side effects during morphine therapy (2.1 to 7.6, table 1). Even a ratio of 7.6 or 8.4 did not protect other patients from long-lasting M6G induced coma<sup>21</sup> or other opioid side effects,<sup>20</sup> respectively. Furthermore, the hypothesis of M3G as an antagonist of the depressing actions of morphine and M6G has been repeatedly contradicted.<sup>22</sup>

Age might explain why patient B, aged 87, was more susceptible to the central depressing effects of M6G than 67-yr-old patient S. Another factor that might have contributed to the difference in M6G-tolerability between the patients might be the development of opioid tolerance in patient S. He was treated with morphine for a longer period of time than patient B, and one could speculate that the intolerance of morphine treatment of patient B would have disappeared later because of tolerance development. However, in contrast to patient B, patient S tolerated morphine from the beginning of the therapy.

The mutated G118 allele has a frequency among Caucasians of about 11.5%.<sup>23</sup> The expected frequency of homozygous and heterozygous patients is approximately 2 and 20%, respectively. Clinical experience suggests that more than one-fifth of the subjects receiving morphine despite renal dysfunction tolerate that treatment without developing severe side effects. Thus, the G118 may be one but not the only factor that protects a patient with renal failure from M6G-related opioid toxicity. On the other hand, there might be additional risk factors for M6G toxicity such as age, drug interactions, or disease state. To enlarge the support of our hypothesis of a protective effect of the G118 allele against M6G toxicity, and to identify other factors that play a role in the development of side effects, more patients need to be studied. Nonetheless, the evidence presented here encourages the hope that pharmacogenetics will provide a finer tool to individualize therapy than blunt contraindication of morphine for patients with renal failure.

The authors thank the Deutsche Forschungsgemeinschaft (Bonn, Germany: DFG Lo 612/3-3) for project funding, and TIB MOLBIOL (Berlin, Germany) for help with the PCR-primer design.

## References

1. Lötsch J, Weiss M, Ahne G, Kopal G, Geisslinger G: Pharmacokinetic modeling of M6G formation after oral administration of morphine in healthy volunteers. *ANESTHESIOLOGY* 1999; 90:1026-38
2. Engelhardt W, Friess K, Hartung E, Sold M, Dierks T: EEG and auditory evoked potential P300 compared with psychometric tests in assessing vigilance after benzodiazepine sedation and antagonism. *Br J Anaesth* 1992; 69:75-80
3. Cherny N, Ripamonti C, Pereira J, Davis C, Fallon M, McQuay H, Mercadante S, Pasternak G, Ventafridda V: Strategies to manage the adverse effects of oral morphine: An evidence-based report. *J Clin Oncol* 2001; 19:2542-54
4. Lötsch J, Skarke C, Grösch S, Darimont J, Schmidt H, Geisslinger G: The polymorphism A118G of the human  $\mu$ -opioid receptor gene decreases the clinical activity of morphine-6-glucuronide but not that of morphine. *Pharmacogenetics* 2002; 12:3-9
5. Demeule M, Labelle M, Regina A, Berthelet F, Beliveau R: Isolation of endothelial cells from brain, lung, and kidney: Expression of the multidrug resistance P-glycoprotein isoforms. *Biochem Biophys Res Commun* 2001; 281:827-34
6. Huwylar J, Drewe J, Klusemann C, Fricker G: Evidence for P-glycoprotein-mediated penetration of morphine-6-glucuronide into brain capillary endothelium. *Br J Pharmacol* 1996; 118:1879-85
7. King M, Su W, Chang A, Zuckerman A, Pasternak GW: Transport of opioids from the brain to the periphery by P-glycoprotein: peripheral actions of central drugs. *Nat Neurosci* 2001; 4:268-74
8. Hoffmeyer S, Burk O, von Richter O, Arnold HP, Brockmoller J, John A, Cascorbi I, Gerloff T, Roots I, Eichelbaum M, Brinkmann U: Functional polymorphisms of the human multidrug-resistance gene: multiple sequence variations and correlation of one allele with P-glycoprotein expression and activity in vivo. *Proc Natl Acad Sci USA* 2000; 97:3473-8
9. Cascorbi I, Gerloff T, John A, Meisel C, Hoffmeyer S, Schwab M, Schaeffeler E, Eichelbaum M, Brinkmann U, Roots I: Frequency of single nucleotide polymorphisms in the P-glycoprotein drug transporter MDR1 gene in white subjects. *Clin Pharmacol Ther* 2001; 69:169-74
10. Keppler D, Leier I, Jedlitschky G: Transport of glutathione conjugates and glucuronides by the multidrug resistance proteins MRP1 and MRP2. *Biol Chem* 1997; 378:787-91
11. Morin RA, Lyness WH: Potentiation of morphine analgesia after pretreatment with probenecid or sulfinpyrazone. *Pharmacol Biochem Behav* 1983; 18:885-9
12. Klein I, Sarkadi B, Varadi A: An inventory of the human ABC proteins. *Biochim Biophys Acta* 1999; 1461:237-62
13. Tamai I, Nozawa T, Koshida M, Nezu J, Sai Y, Tsuji A: Functional characterization of human organic anion transporting polypeptide B (OATP-B) in comparison with liver-specific OATP-C. *Pharm Res* 2001; 18:1262-9
14. Sweet DH, Bush KT, Nigam SK: The organic anion transporter family: from physiology to ontogeny and the clinic. *Am J Physiol Renal Physiol* 2001; 281:F197-205
15. Sekine T, Cha SH, Endou H: The multispecific organic anion transporter (OAT) family. *Pflügers Arch* 2000; 440:337-50
16. Pauli-Magnus C, Rekersbrink S, Klotz U, Fromm MF: Interaction of omeprazole, lansoprazole and pantoprazole with P-glycoprotein. *Naunyn Schmiedeberg Arch Pharmacol* 2001; 364:551-7
17. Xie HG, Stein CM, Kim RB, Wilkinson GR, Flockhart DA, Wood AJ: Allelic, genotypic and phenotypic distributions of S-mephenytoin 4'-hydroxylase (CYP2C19) in healthy Caucasian populations of European descent throughout the world. *Pharmacogenetics* 1999; 9:539-49
18. Griesse EU, Lapple F, Eichelbaum M: Detection of CYP2C19 alleles \*1, \*2 and \*3 by multiplex polymerase chain reaction. *Pharmacogenetics* 1999; 9:389-91
19. Gong QL, Hedner J, Bjorkman R, Hedner T: Morphine-3-glucuronide may functionally antagonize morphine-6-glucuronide induced antinociception and ventilatory depression in the rat. *Pain* 1992; 48:249-55
20. Ashby M, Fleming B, Wood M, Somogyi A: Plasma morphine and glucuronide (M3G and M6G) concentrations in hospice inpatients. *J Pain Symptom Manage* 1997; 14:157-67
21. Angst MS, Bühner M, Lötsch J: Insidious Intoxication After Morphine Treatment in Renal Failure: Delayed Onset of Morphine-6-glucuronide Action. *ANESTHESIOLOGY* 2000; 92:1473-6
22. Suzuki N, Kalso E, Rosenberg PH: Intrathecal morphine-3-glucuronide does not antagonize spinal antinociception by morphine or morphine-6-glucuronide in rats. *Eur J Pharmacol* 1993; 249:247-50
23. Bond C, LaForge KS, Tian M, Melia D, Zhang S, Borg L, Gong J, Schlager J, Strong JA, Leal SM, Tischfield JA, Kreek MJ, Yu L: Single-nucleotide polymorphism in the human  $\mu$  opioid receptor gene alters beta-endorphin binding and activity: possible implications for opiate addiction. *Proc Natl Acad Sci USA* 1998; 95:9608-13
24. Osborne RJ, Joel SP, Slevin ML: Morphine intoxication in renal failure: the role of morphine-6-glucuronide. *Br Med J Clin Res Ed* 1986; 292:1548-9
25. Tiseo PJ, Thaler HT, Lapin J, Inturrisi CE, Portenoy RK, Foley KM: Morphine-6-glucuronide concentrations and opioid-related side effects: a survey in cancer patients. *Pain* 1995; 61:47-54
26. Hagen NA, Foley KM, Cerbone DJ, Portenoy RK, Inturrisi CE: Chronic nausea and morphine-6-glucuronide. *J Pain Symptom Manage* 1991; 6:125-8
27. Hasselström J, Berg U, Lofgren A, Säwe J: Long lasting respiratory depression induced by morphine-6-glucuronide? *Br J Clin Pharmacol* 1989; 27:515-8
28. Bodd E, Jacobsen D, Lund E, Ripel A, Morland J, Wiik L: Morphine-6-glucuronide might mediate the prolonged opioid effect of morphine in acute renal failure. *Hum Exp Toxicol* 1990; 9:317-21
29. Bion JF, Logan BK, Newman PM, Brodie MJ, Oliver JS, Aitchison TC, Ledingham IM: Sedation in intensive care: morphine and renal function. *Intensive Care Med* 1986; 12:359-65
30. Uhl GR, Sora I, Wang Z: The  $\mu$  opiate receptor as a candidate gene for pain: polymorphisms, variations in expression, nociception, and opiate responses. *Proc Natl Acad Sci USA* 1999; 96:7752-5
31. Berrettini WH, Hoehe MR, Ferraro TN, Demaria PA, Gotthel E: Human  $\mu$  opioid receptor gene polymorphisms and vulnerability to substance abuse. *Addiction Biology* 1997; 2:303-8
32. Bergen AW, Kokoszka J, Peterson R, Long JC, Virkkunen M, Linnoila M, Goldman D:  $\mu$  opioid receptor gene variants: Lack of association with alcohol dependence. *Mol Psychiatry* 1997; 2:490-4
33. Befort K, Filliol D, Decaillot FM, Gaveriaux-Ruff C, Hoehe MR, Kieffer BL: A single-nucleotide polymorphic mutation in the human  $\mu$ -opioid receptor severely impairs receptor signaling. *J Biol Chem* 2001; 276:3130-7
34. Ito S, Ieiri I, Tanabe M, Suzuki A, Higuchi S, Otsubo K: Polymorphism of the ABC transporter genes, MDR1, MRP1 and MRP2/cMOAT, in healthy Japanese subjects. *Pharmacogenetics* 2001; 11:175-84
